# Supplementary material
Source: publisher figshare collection journal article supplement (https://acs.figshare.com/ndownloader/files/4531438)
Supplement: Supplementary file 1 [file 4531438]

data_General
_audit_creation_date                  '2008-09-25'
_audit_creation_method                'by CrystalStructure 3.6.0'
_audit_update_record                   ?

#==============================================================================

# PROCESSING SUMMARY (IUCr Office Use Only)

_journal_date_recd_electronic     ?
_journal_date_from_coeditor       ?
_journal_date_accepted            ?
_journal_coeditor_code            ?

#==============================================================================

# SUBMISSION DETAILS

_publ_contact_author_name             'ENTER NAME'
_publ_contact_author_email            'ENTER EMAIL ADDRESS'
_publ_contact_author_fax              'ENTER FAX NUMBER'
_publ_contact_author_phone            'ENTER PHONE NUMBER'
_publ_contact_letter
;
    ENTER TEXT OF LETTER
;
_publ_requested_journal               'ENTER JOURNAL NAME HERE'
_publ_requested_category              'CHOOSE FI FM FO CI CM CO or AD'
_publ_requested_coeditor_name          ?

#==============================================================================

# TITLE AND AUTHOR LIST

_publ_section_title
;
    ENTER SECTION TITLE
;
_publ_section_title_footnote
;
    ENTER FOOTNOTE TO TITLE OF PAPER
;
loop_
_publ_author_name
_publ_author_footnote
_publ_author_address
' FIRST AUTHORS NAME '
;
  FIRST AUTHORS FOOTNOTES
;
;
  FIRST AUTHORS ADDRESS
;
_publ_section_synopsis
;
  ENTER SYNOPSIS
;

#==============================================================================

# TEXT

_publ_section_abstract
;
    ENTER ABSTRACT
;
_publ_section_comment
;
    ENTER TEXT
;
_publ_section_references
;
    ENTER OTHER REFERENCES

    Rigaku/MSC and Rigaku Corporation. (2004).
    CrystalStructure 3.6.0.
    Single Crystal Structure Analysis Software.
    Rigaku/MSC, 9009 New Trails Drive, The Woodlands, TX, USA 77381-5209.
    Rigaku, 3-9-12 Akishima, Tokyo 196-8666, Japan.

    Watkin, D.J., Prout, C.K. Carruthers, J.R. & Betteridge, P.W. (1996)
    CRYSTALS Issue 10, Chemical Crystallography Laboratory, Oxford, UK.

;
_publ_section_figure_captions
;
    ENTER FIGURE CAPTIONS
;
_publ_section_exptl_prep
;
    ENTER COMPOUND PREPARATION DETAILS
;
_publ_section_exptl_refinement
;
    ENTER SPECIAL DETAILS OF THE REFINEMENT
;

#==============================================================================

data__080924

#==============================================================================

# CHEMICAL DATA

_chemical_formula_sum                  'C19 H27 N3 '
_chemical_formula_moiety               'C19 H27 N3 '
_chemical_formula_weight               297.44
_chemical_melting_point                ?

#==============================================================================

# CRYSTAL DATA
_symmetry_cell_setting                 monoclinic
_symmetry_space_group_name_H-M        'P 1 21/a 1'
_symmetry_space_group_name_Hall       '-P 2yab'
_symmetry_Int_Tables_number            14
loop_
_symmetry_equiv_pos_site_id
_symmetry_equiv_pos_as_xyz
1   '+X,+Y,+Z'
2   '1/2-X,1/2+Y,-Z'
3   '-X,-Y,-Z'
4   '1/2+X,1/2-Y,+Z'

#------------------------------------------------------------------------------

_cell_length_a                         12.2188(6)
_cell_length_b                         11.5364(6)
_cell_length_c                         12.5909(7)
_cell_angle_alpha                      90
_cell_angle_beta                       107.823(1)
_cell_angle_gamma                      90
_cell_volume                           1689.6(2)
_cell_formula_units_Z                  4
_cell_measurement_reflns_used          10584
_cell_measurement_theta_min            3.3
_cell_measurement_theta_max            25.4
_cell_measurement_temperature          93.1

#------------------------------------------------------------------------------

_exptl_crystal_description            'prism'
_exptl_crystal_colour                 'colorless'
_exptl_crystal_size_max                0.50
_exptl_crystal_size_mid                0.30
_exptl_crystal_size_min                0.10
_exptl_crystal_density_diffrn          1.169
_exptl_crystal_density_meas            ?
_exptl_crystal_density_method         'not measured'
_exptl_crystal_F_000                   648.00
_exptl_absorpt_coefficient_mu          0.070
_exptl_absorpt_correction_type         numerical
_exptl_absorpt_process_details         
;
    Higashi, T. (1999). Program for Absorption Correction.
    Rigaku Corporation, Tokyo, Japan.
;
_exptl_absorpt_correction_T_min        0.978
_exptl_absorpt_correction_T_max        0.993

#==============================================================================

# EXPERIMENTAL DATA

_diffrn_radiation_type                'Mo K\a'
_diffrn_radiation_wavelength           0.7107
_diffrn_measurement_device_type       'Rigaku RAXIS-RAPID'
_diffrn_measurement_method             \w
_diffrn_detector_area_resol_mean       10.00
_diffrn_reflns_number                  12578
_diffrn_reflns_av_R_equivalents        0.028
_diffrn_reflns_theta_max               25.35
_diffrn_measured_fraction_theta_max    0.9933
_diffrn_reflns_theta_full              25.35
_diffrn_measured_fraction_theta_full   0.9933
_diffrn_reflns_limit_h_min             -14
_diffrn_reflns_limit_h_max             14
_diffrn_reflns_limit_k_min             -13
_diffrn_reflns_limit_k_max             13
_diffrn_reflns_limit_l_min             -15
_diffrn_reflns_limit_l_max             15

#==============================================================================

# REFINEMENT DATA

_refine_special_details
;
    Refinement using all reflections. The weighted 
    R-factor (wR) and goodness of fit (S) are based on F^2^.
    R-factor (gt) are based on F. The threshold expression of
    F^2^ > 2.0 sigma(F^2^) is used only for calculating R-factor (gt).
;
_reflns_number_total                   3087
_reflns_number_gt                      2436
_reflns_threshold_expression           F^2^>2.0\s(F^2^)
_refine_ls_structure_factor_coef       Fsqd
_refine_ls_R_factor_gt                 0.0420
_refine_ls_wR_factor_ref               0.0840
_refine_ls_hydrogen_treatment          refall
_refine_ls_number_reflns               3087
_refine_ls_number_parameters           262
_refine_ls_goodness_of_fit_ref         1.788
_refine_ls_weighting_scheme            sigma
_refine_ls_weighting_details
'w = 1/\s^2^(Fo^2^)'
_refine_ls_shift/su_max                0.0000
_refine_diff_density_max               0.68
_refine_diff_density_min               -0.72
_refine_ls_extinction_method           none
_refine_ls_extinction_coef             ?

loop_
_atom_type_symbol
_atom_type_description
_atom_type_scat_dispersion_real
_atom_type_scat_dispersion_imag
_atom_type_scat_source
  'C' 'C'  0.003 0.002 
;
International Tables for Crystallography
(1992, Vol. C, Tables 4.2.6.8 and 6.1.1.4)
;
  'H' 'H'  0.000 0.000 
;
International Tables for Crystallography
(1992, Vol. C, Table 6.1.1.4)
;
  'N' 'N'  0.006 0.003 
;
International Tables for Crystallography
(1992, Vol. C, Tables 4.2.6.8 and 6.1.1.4)
;

#==============================================================================

# ATOMIC COORDINATES AND THERMAL PARAMETERS

loop_
_atom_site_label
_atom_site_type_symbol
_atom_site_fract_x
_atom_site_fract_y
_atom_site_fract_z
_atom_site_U_iso_or_equiv
_atom_site_adp_type
_atom_site_occupancy
_atom_site_symmetry_multiplicity
_atom_site_calc_flag
_atom_site_refinement_flags
_atom_site_disorder_assembly
_atom_site_disorder_group
 N(1)   N  0.76874(9)  0.0288(1)   1.1019(1)   0.0214(3)   Uani 1.00 1 d . . .
 N(2)   N  0.83355(9)  0.0764(1)   0.9455(1)   0.0173(3)   Uani 1.00 1 d . . .
 N(3)   N  0.83130(9)  0.1674(1)   0.7089(1)   0.0172(3)   Uani 1.00 1 d . . .
 C(1)   C  0.9230(1)   0.1192(1)   0.9086(1)   0.0169(4)   Uani 1.00 1 d . . .
 C(2)   C  1.0113(1)   0.1779(1)   0.9788(1)   0.0183(4)   Uani 1.00 1 d . . .
 C(3)   C  1.0150(1)   0.2027(1)   1.0918(1)   0.0179(4)   Uani 1.00 1 d . . .
 C(4)   C  1.1021(1)   0.2696(1)   1.1645(1)   0.0216(4)   Uani 1.00 1 d . . .
 C(5)   C  1.1021(1)   0.2909(1)   1.2722(1)   0.0258(4)   Uani 1.00 1 d . . .
 C(6)   C  1.0148(1)   0.2460(1)   1.3106(1)   0.0262(4)   Uani 1.00 1 d . . .
 C(7)   C  0.9289(1)   0.1798(1)   1.2402(1)   0.0226(4)   Uani 1.00 1 d . . .
 C(8)   C  0.9277(1)   0.1568(1)   1.1308(1)   0.0188(4)   Uani 1.00 1 d . . .
 C(9)   C  0.8370(1)   0.0821(1)   1.0577(1)   0.0176(4)   Uani 1.00 1 d . . .
 C(10)  C  0.6761(1)   -0.0417(1)  1.0299(1)   0.0244(4)   Uani 1.00 1 d . . .
 C(11)  C  0.6372(1)   0.0013(1)   0.9110(1)   0.0222(4)   Uani 1.00 1 d . . .
 C(12)  C  0.7404(1)   0.0090(1)   0.8680(1)   0.0209(4)   Uani 1.00 1 d . . .
 C(13)  C  0.9187(1)   0.0973(1)   0.7892(1)   0.0184(4)   Uani 1.00 1 d . . .
 C(14)  C  0.8522(1)   0.2936(1)   0.7229(1)   0.0190(4)   Uani 1.00 1 d . . .
 C(15)  C  0.9452(1)   0.3416(1)   0.6762(1)   0.0231(5)   Uani 1.00 1 d . . .
 C(16)  C  0.7395(1)   0.3595(1)   0.6774(1)   0.0230(5)   Uani 1.00 1 d . . .
 C(17)  C  0.8025(1)   0.1252(1)   0.5928(1)   0.0199(4)   Uani 1.00 1 d . . .
 C(18)  C  0.7086(1)   0.0328(2)   0.5709(1)   0.0276(5)   Uani 1.00 1 d . . .
 C(19)  C  0.9039(1)   0.0806(1)   0.5561(1)   0.0238(5)   Uani 1.00 1 d . . .
 H(1)   H  1.0725      0.2034      0.9530      0.023       Uiso 1.00 1 c R . .
 H(2)   H  1.1617      0.3006      1.1392      0.025       Uiso 1.00 1 c R . .
 H(3)   H  1.1617      0.3362      1.3205      0.028       Uiso 1.00 1 c R . .
 H(4)   H  1.0147      0.2611      1.3847      0.031       Uiso 1.00 1 c R . .
 H(5)   H  0.8697      0.1493      1.2665      0.027       Uiso 1.00 1 c R . .
 H(6)   H  0.7026      -0.1192     1.0306      0.030       Uiso 1.00 1 c R . .
 H(7)   H  0.6126      -0.0399     1.0584      0.029       Uiso 1.00 1 c R . .
 H(8)   H  0.5824      -0.0510     0.8659      0.026       Uiso 1.00 1 c R . .
 H(9)   H  0.6033      0.0758      0.9083      0.026       Uiso 1.00 1 c R . .
 H(10)  H  0.7179      0.0457      0.7971      0.025       Uiso 1.00 1 c R . .
 H(11)  H  0.7673      -0.0670     0.8610      0.025       Uiso 1.00 1 c R . .
 H(12)  H  0.9019      0.0177      0.7727      0.023       Uiso 1.00 1 c R . .
 H(13)  H  0.9918      0.1151      0.7814      0.022       Uiso 1.00 1 c R . .
 H(14)  H  0.8782      0.3076      0.8010      0.022       Uiso 1.00 1 c R . .
 H(15)  H  0.924(1)    0.334(1)    0.592(1)    0.020(4)    Uiso 1.00 1 c . . .
 H(16)  H  0.957(1)    0.427(2)    0.692(1)    0.029(4)    Uiso 1.00 1 c . . .
 H(17)  H  1.022(1)    0.303(1)    0.712(1)    0.031(4)    Uiso 1.00 1 c . . .
 H(18)  H  0.708(1)    0.353(1)    0.594(1)    0.027(4)    Uiso 1.00 1 c . . .
 H(19)  H  0.751(1)    0.443(1)    0.698(1)    0.025(4)    Uiso 1.00 1 c . . .
 H(20)  H  0.681(1)    0.327(2)    0.711(1)    0.040(5)    Uiso 1.00 1 c . . .
 H(21)  H  0.7707      0.1891      0.5460      0.023       Uiso 1.00 1 c R . .
 H(22)  H  0.686(1)    0.009(1)    0.492(1)    0.031(4)    Uiso 1.00 1 c . . .
 H(23)  H  0.642(1)    0.061(1)    0.589(1)    0.030(4)    Uiso 1.00 1 c . . .
 H(24)  H  0.740(1)    -0.038(2)   0.616(1)    0.035(5)    Uiso 1.00 1 c . . .
 H(25)  H  0.972(1)    0.139(1)    0.575(1)    0.027(4)    Uiso 1.00 1 c . . .
 H(26)  H  0.878(1)    0.067(1)    0.476(1)    0.026(4)    Uiso 1.00 1 c . . .
 H(27)  H  0.936(1)    0.008(2)    0.593(1)    0.031(5)    Uiso 1.00 1 c . . .


loop_
_atom_site_aniso_label
_atom_site_aniso_U_11
_atom_site_aniso_U_22
_atom_site_aniso_U_33
_atom_site_aniso_U_12
_atom_site_aniso_U_13
_atom_site_aniso_U_23
 N(1)   0.0224(6)   0.0206(7)   0.0230(8)   0.0008(5)   0.0095(5)   0.0041(6)  
 N(2)   0.0185(6)   0.0165(7)   0.0176(7)   0.0002(5)   0.0065(5)   0.0017(6)  
 N(3)   0.0215(6)   0.0147(7)   0.0143(7)   0.0020(5)   0.0037(5)   0.0001(6)  
 C(1)   0.0177(7)   0.0144(8)   0.0194(9)   0.0048(6)   0.0070(6)   0.0060(7)  
 C(2)   0.0172(7)   0.0181(8)   0.0209(9)   0.0047(6)   0.0079(6)   0.0063(7)  
 C(3)   0.0174(7)   0.0156(8)   0.0200(9)   0.0042(6)   0.0045(6)   0.0055(7)  
 C(4)   0.0201(7)   0.0203(9)   0.0232(9)   0.0014(6)   0.0048(6)   0.0052(7)  
 C(5)   0.0260(8)   0.0230(9)   0.024(1)    -0.0003(7)  0.0006(7)   0.0015(8)  
 C(6)   0.0304(8)   0.030(1)    0.0177(9)   0.0031(7)   0.0064(7)   0.0008(7)  
 C(7)   0.0243(8)   0.0233(9)   0.0208(9)   0.0037(6)   0.0078(6)   0.0034(7)  
 C(8)   0.0199(7)   0.0168(8)   0.0191(9)   0.0054(6)   0.0048(6)   0.0040(7)  
 C(9)   0.0202(7)   0.0154(8)   0.0184(8)   0.0065(6)   0.0076(6)   0.0047(7)  
 C(10)  0.0228(7)   0.0244(9)   0.0275(9)   -0.0027(7)  0.0101(6)   0.0032(8)  
 C(11)  0.0208(7)   0.0207(9)   0.0251(9)   -0.0032(6)  0.0070(6)   0.0013(7)  
 C(12)  0.0220(7)   0.0195(8)   0.0211(9)   -0.0014(6)  0.0066(6)   -0.0008(7) 
 C(13)  0.0190(7)   0.0179(8)   0.0197(9)   0.0017(6)   0.0078(6)   0.0024(7)  
 C(14)  0.0256(7)   0.0149(8)   0.0148(8)   0.0005(6)   0.0037(6)   -0.0007(6) 
 C(15)  0.0235(8)   0.0192(9)   0.025(1)    -0.0024(7)  0.0053(7)   0.0022(8)  
 C(16)  0.0261(8)   0.0189(9)   0.024(1)    0.0058(7)   0.0077(7)   0.0010(8)  
 C(17)  0.0231(7)   0.0188(9)   0.0173(8)   0.0010(6)   0.0057(6)   -0.0004(7) 
 C(18)  0.0280(8)   0.031(1)    0.025(1)    -0.0049(8)  0.0098(7)   -0.0088(9) 
 C(19)  0.0271(8)   0.026(1)    0.0198(9)   0.0024(7)   0.0100(7)   -0.0029(8) 

#==============================================================================

_computing_data_collection            'PROCESS-AUTO'
_computing_cell_refinement            'PROCESS-AUTO'
_computing_data_reduction             'CrystalStructure'
_computing_structure_solution         'SIR92'
_computing_structure_refinement       'CRYSTALS'
_computing_publication_material       'CrystalStructure 3.6.0'
_computing_molecular_graphics          ?

#==============================================================================

# MOLECULAR GEOMETRY

_geom_special_details
;
    ENTER SPECIAL DETAILS OF THE MOLECULAR GEOMETRY
;

loop_
_geom_bond_atom_site_label_1
_geom_bond_atom_site_label_2
_geom_bond_distance
_geom_bond_publ_flag
_geom_bond_site_symmetry_1
_geom_bond_site_symmetry_2
N(1)      C(9)      1.290(2)    ?     . .
N(1)      C(10)     1.461(2)    ?     . .
N(2)      C(1)      1.402(2)    ?     . .
N(2)      C(9)      1.403(2)    ?     . .
N(2)      C(12)     1.474(2)    ?     . .
N(3)      C(13)     1.467(2)    ?     . .
N(3)      C(14)     1.479(2)    ?     . .
N(3)      C(17)     1.477(2)    ?     . .
C(1)      C(2)      1.348(2)    ?     . .
C(1)      C(13)     1.509(2)    ?     . .
C(2)      C(3)      1.438(2)    ?     . .
C(3)      C(4)      1.404(2)    ?     . .
C(3)      C(8)      1.408(2)    ?     . .
C(4)      C(5)      1.378(2)    ?     . .
C(5)      C(6)      1.398(2)    ?     . .
C(6)      C(7)      1.380(2)    ?     . .
C(7)      C(8)      1.398(2)    ?     . .
C(8)      C(9)      1.482(2)    ?     . .
C(10)     C(11)     1.510(2)    ?     . .
C(11)     C(12)     1.519(2)    ?     . .
C(14)     C(15)     1.535(2)    ?     . .
C(14)     C(16)     1.523(2)    ?     . .
C(17)     C(18)     1.528(2)    ?     . .
C(17)     C(19)     1.537(2)    ?     . .
C(2)      H(1)      0.9490      ?     . .
C(4)      H(2)      0.9496      ?     . .
C(5)      H(3)      0.9502      ?     . .
C(6)      H(4)      0.9494      ?     . .
C(7)      H(5)      0.9499      ?     . .
C(10)     H(6)      0.9498      ?     . .
C(10)     H(7)      0.9495      ?     . .
C(11)     H(8)      0.9499      ?     . .
C(11)     H(9)      0.9500      ?     . .
C(12)     H(10)     0.9497      ?     . .
C(12)     H(11)     0.9497      ?     . .
C(13)     H(12)     0.9502      ?     . .
C(13)     H(13)     0.9505      ?     . .
C(14)     H(14)     0.9502      ?     . .
C(15)     H(15)     1.01(2)     ?     . .
C(15)     H(16)     1.01(2)     ?     . .
C(15)     H(17)     1.01(1)     ?     . .
C(16)     H(18)     1.01(2)     ?     . .
C(16)     H(19)     0.99(2)     ?     . .
C(16)     H(20)     1.00(2)     ?     . .
C(17)     H(21)     0.9496      ?     . .
C(18)     H(22)     0.98(2)     ?     . .
C(18)     H(23)     0.96(2)     ?     . .
C(18)     H(24)     1.00(2)     ?     . .
C(19)     H(25)     1.04(2)     ?     . .
C(19)     H(26)     0.97(2)     ?     . .
C(19)     H(27)     0.98(2)     ?     . .
H(23)     C(18)     0.96(2)     ?     . .

loop_
_geom_angle_atom_site_label_1
_geom_angle_atom_site_label_2
_geom_angle_atom_site_label_3
_geom_angle
_geom_angle_publ_flag
_geom_angle_site_symmetry_1
_geom_angle_site_symmetry_2
_geom_angle_site_symmetry_3
N(1)      C(9)      N(2)      126.0(1)    ?     . . .
N(1)      C(9)      C(8)      118.0(1)    ?     . . .
C(10)     N(1)      C(9)      118.6(1)    ?     . . .
N(1)      C(10)     C(11)     112.4(1)    ?     . . .
C(9)      N(2)      C(1)      122.1(1)    ?     . . .
C(12)     N(2)      C(1)      119.3(1)    ?     . . .
N(2)      C(1)      C(2)      120.5(1)    ?     . . .
N(2)      C(1)      C(13)     118.5(1)    ?     . . .
N(2)      C(9)      C(8)      116.1(1)    ?     . . .
C(12)     N(2)      C(9)      118.0(1)    ?     . . .
N(2)      C(12)     C(11)     110.6(1)    ?     . . .
N(3)      C(13)     C(1)      113.0(1)    ?     . . .
C(14)     N(3)      C(13)     113.4(1)    ?     . . .
C(17)     N(3)      C(13)     113.7(1)    ?     . . .
N(3)      C(14)     C(15)     115.5(1)    ?     . . .
N(3)      C(14)     C(16)     110.1(1)    ?     . . .
C(17)     N(3)      C(14)     114.9(1)    ?     . . .
N(3)      C(17)     C(18)     110.3(1)    ?     . . .
N(3)      C(17)     C(19)     116.0(1)    ?     . . .
C(1)      C(2)      C(3)      121.7(1)    ?     . . .
C(13)     C(1)      C(2)      121.0(1)    ?     . . .
C(2)      C(3)      C(8)      118.2(1)    ?     . . .
C(2)      C(3)      C(4)      122.9(1)    ?     . . .
C(8)      C(3)      C(4)      118.9(1)    ?     . . .
C(3)      C(4)      C(5)      120.8(1)    ?     . . .
C(3)      C(8)      C(7)      119.5(1)    ?     . . .
C(3)      C(8)      C(9)      120.3(1)    ?     . . .
C(4)      C(5)      C(6)      120.3(1)    ?     . . .
C(5)      C(6)      C(7)      119.6(2)    ?     . . .
C(6)      C(7)      C(8)      120.9(1)    ?     . . .
C(7)      C(8)      C(9)      120.1(1)    ?     . . .
C(10)     C(11)     C(12)     109.2(1)    ?     . . .
C(16)     C(14)     C(15)     111.5(1)    ?     . . .
C(19)     C(17)     C(18)     110.0(1)    ?     . . .
N(1)      C(10)     H(6)      108.7581    ?     . . .
N(1)      C(10)     H(7)      108.7435    ?     . . .
N(2)      C(12)     H(11)     109.2083    ?     . . .
N(2)      C(12)     H(10)     109.2096    ?     . . .
N(3)      C(13)     H(12)     108.6183    ?     . . .
N(3)      C(13)     H(13)     108.6238    ?     . . .
N(3)      C(14)     H(14)     106.3646    ?     . . .
N(3)      C(17)     H(21)     106.6846    ?     . . .
C(1)      C(2)      H(1)      119.1560    ?     . . .
C(1)      C(13)     H(12)     108.5766    ?     . . .
C(1)      C(13)     H(13)     108.5843    ?     . . .
H(1)      C(2)      C(3)      119.1441    ?     . . .
C(3)      C(4)      H(2)      119.6168    ?     . . .
H(2)      C(4)      C(5)      119.6194    ?     . . .
C(4)      C(5)      H(3)      119.8082    ?     . . .
H(3)      C(5)      C(6)      119.8903    ?     . . .
C(5)      C(6)      H(4)      120.2204    ?     . . .
C(6)      C(7)      H(5)      119.4872    ?     . . .
H(4)      C(6)      C(7)      120.1794    ?     . . .
H(5)      C(7)      C(8)      119.5884    ?     . . .
H(6)      C(10)     C(11)     108.7275    ?     . . .
H(7)      C(10)     C(11)     108.7556    ?     . . .
C(10)     C(11)     H(8)      109.5225    ?     . . .
C(10)     C(11)     H(9)      109.5152    ?     . . .
H(7)      C(10)     H(6)      109.4600    ?     . . .
H(8)      C(11)     C(12)     109.5285    ?     . . .
H(9)      C(11)     C(12)     109.5897    ?     . . .
C(11)     C(12)     H(11)     109.1724    ?     . . .
C(11)     C(12)     H(10)     109.1567    ?     . . .
H(9)      C(11)     H(8)      109.4760    ?     . . .
H(11)     C(12)     H(10)     109.4541    ?     . . .
H(13)     C(13)     H(12)     109.4421    ?     . . .
H(14)     C(14)     C(15)     106.4008    ?     . . .
C(14)     C(15)     H(15)     112.6(8)    ?     . . .
C(14)     C(15)     H(16)     110(1)      ?     . . .
C(14)     C(15)     H(17)     111(1)      ?     . . .
H(14)     C(14)     C(16)     106.3680    ?     . . .
C(14)     C(16)     H(18)     111.5(9)    ?     . . .
C(14)     C(16)     H(19)     110.0(7)    ?     . . .
C(14)     C(16)     H(20)     109.4(9)    ?     . . .
H(16)     C(15)     H(15)     105(1)      ?     . . .
H(17)     C(15)     H(15)     109(1)      ?     . . .
H(17)     C(15)     H(16)     106(1)      ?     . . .
H(19)     C(16)     H(18)     108(1)      ?     . . .
H(20)     C(16)     H(18)     108(1)      ?     . . .
H(20)     C(16)     H(19)     108(1)      ?     . . .
H(21)     C(17)     C(18)     106.6846    ?     . . .
C(17)     C(18)     H(22)     110(1)      ?     . . .
C(17)     C(18)     H(23)     111.1(9)    ?     . . .
C(17)     C(18)     H(24)     109.4(9)    ?     . . .
H(21)     C(17)     C(19)     106.7041    ?     . . .
C(17)     C(19)     H(25)     112.0(9)    ?     . . .
C(17)     C(19)     H(26)     109.4(9)    ?     . . .
C(17)     C(19)     H(27)     112(1)      ?     . . .
H(23)     C(18)     H(22)     109(1)      ?     . . .
H(24)     C(18)     H(22)     106(1)      ?     . . .
H(24)     C(18)     H(23)     110(1)      ?     . . .
H(26)     C(19)     H(25)     109(1)      ?     . . .
H(27)     C(19)     H(25)     105(1)      ?     . . .
H(27)     C(19)     H(26)     107(1)      ?     . . .

loop_
_geom_torsion_atom_site_label_1
_geom_torsion_atom_site_label_2
_geom_torsion_atom_site_label_3
_geom_torsion_atom_site_label_4
_geom_torsion
_geom_torsion_publ_flag
_geom_torsion_site_symmetry_1
_geom_torsion_site_symmetry_2
_geom_torsion_site_symmetry_3
_geom_torsion_site_symmetry_4
C(10)     N(1)      C(9)      N(2)      -2.1(2)     ?     . . . .
C(10)     N(1)      C(9)      C(8)      177.7(1)    ?     . . . .
C(9)      N(1)      C(10)     C(11)     -28.0(2)    ?     . . . .
C(9)      N(2)      C(1)      C(2)      -6.4(2)     ?     . . . .
C(9)      N(2)      C(1)      C(13)     173.1(1)    ?     . . . .
C(12)     N(2)      C(1)      C(2)      -177.8(1)   ?     . . . .
C(12)     N(2)      C(1)      C(13)     1.7(2)      ?     . . . .
C(1)      N(2)      C(9)      N(1)      -167.9(1)   ?     . . . .
C(1)      N(2)      C(9)      C(8)      12.2(2)     ?     . . . .
C(12)     N(2)      C(9)      N(1)      3.6(2)      ?     . . . .
C(12)     N(2)      C(9)      C(8)      -176.3(1)   ?     . . . .
C(1)      N(2)      C(12)     C(11)     -163.4(1)   ?     . . . .
C(9)      N(2)      C(12)     C(11)     24.8(2)     ?     . . . .
C(14)     N(3)      C(13)     C(1)      62.5(2)     ?     . . . .
C(17)     N(3)      C(13)     C(1)      -163.7(1)   ?     . . . .
C(13)     N(3)      C(14)     C(15)     77.7(2)     ?     . . . .
C(13)     N(3)      C(14)     C(16)     -155.0(1)   ?     . . . .
C(17)     N(3)      C(14)     C(15)     -55.6(1)    ?     . . . .
C(17)     N(3)      C(14)     C(16)     71.7(2)     ?     . . . .
C(13)     N(3)      C(17)     C(18)     86.6(1)     ?     . . . .
C(13)     N(3)      C(17)     C(19)     -39.3(2)    ?     . . . .
C(14)     N(3)      C(17)     C(18)     -140.3(1)   ?     . . . .
C(14)     N(3)      C(17)     C(19)     93.9(1)     ?     . . . .
N(2)      C(1)      C(2)      C(3)      -2.5(2)     ?     . . . .
C(13)     C(1)      C(2)      C(3)      178.0(1)    ?     . . . .
N(2)      C(1)      C(13)     N(3)      72.7(2)     ?     . . . .
C(2)      C(1)      C(13)     N(3)      -107.8(1)   ?     . . . .
C(1)      C(2)      C(3)      C(4)      -176.0(1)   ?     . . . .
C(1)      C(2)      C(3)      C(8)      4.5(2)      ?     . . . .
C(2)      C(3)      C(4)      C(5)      -179.9(1)   ?     . . . .
C(8)      C(3)      C(4)      C(5)      -0.4(2)     ?     . . . .
C(2)      C(3)      C(8)      C(7)      -179.8(1)   ?     . . . .
C(2)      C(3)      C(8)      C(9)      1.9(2)      ?     . . . .
C(4)      C(3)      C(8)      C(7)      0.7(2)      ?     . . . .
C(4)      C(3)      C(8)      C(9)      -177.6(1)   ?     . . . .
C(3)      C(4)      C(5)      C(6)      -0.1(2)     ?     . . . .
C(4)      C(5)      C(6)      C(7)      0.3(2)      ?     . . . .
C(5)      C(6)      C(7)      C(8)      -0.1(2)     ?     . . . .
C(6)      C(7)      C(8)      C(3)      -0.4(2)     ?     . . . .
C(6)      C(7)      C(8)      C(9)      177.9(1)    ?     . . . .
C(3)      C(8)      C(9)      N(1)      170.3(1)    ?     . . . .
C(3)      C(8)      C(9)      N(2)      -9.9(2)     ?     . . . .
C(7)      C(8)      C(9)      N(1)      -8.0(2)     ?     . . . .
C(7)      C(8)      C(9)      N(2)      171.9(1)    ?     . . . .
N(1)      C(10)     C(11)     C(12)     54.6(2)     ?     . . . .
C(10)     C(11)     C(12)     N(2)      -52.1(2)    ?     . . . .

loop_
_geom_contact_atom_site_label_1
_geom_contact_atom_site_label_2
_geom_contact_distance
_geom_contact_publ_flag
_geom_contact_site_symmetry_1
_geom_contact_site_symmetry_2
N(1)      N(2)      2.400(2)    ?     . .
N(1)      C(4)      3.340(2)    ?     . 45504
N(1)      C(7)      2.794(2)    ?     . .
N(1)      C(8)      2.378(2)    ?     . .
N(1)      C(11)     2.469(2)    ?     . .
N(1)      C(12)     2.866(2)    ?     . .
N(2)      N(3)      3.150(2)    ?     . .
N(2)      C(2)      2.388(2)    ?     . .
N(2)      C(3)      2.816(2)    ?     . .
N(2)      C(8)      2.447(2)    ?     . .
N(2)      C(10)     2.818(2)    ?     . .
N(2)      C(11)     2.461(2)    ?     . .
N(2)      C(13)     2.503(2)    ?     . .
N(3)      C(1)      2.482(2)    ?     . .
N(3)      C(2)      3.438(2)    ?     . .
N(3)      C(12)     3.154(2)    ?     . .
N(3)      C(15)     2.550(2)    ?     . .
N(3)      C(16)     2.462(2)    ?     . .
N(3)      C(18)     2.467(2)    ?     . .
N(3)      C(19)     2.557(2)    ?     . .
C(1)      C(3)      2.434(2)    ?     . .
C(1)      C(8)      2.815(2)    ?     . .
C(1)      C(9)      2.455(2)    ?     . .
C(1)      C(12)     2.482(2)    ?     . .
C(1)      C(14)     3.003(2)    ?     . .
C(2)      C(4)      2.496(2)    ?     . .
C(2)      C(8)      2.442(2)    ?     . .
C(2)      C(9)      2.836(2)    ?     . .
C(2)      C(13)     2.488(2)    ?     . .
C(2)      C(14)     3.479(2)    ?     . .
C(3)      C(5)      2.418(2)    ?     . .
C(3)      C(6)      2.801(2)    ?     . .
C(3)      C(7)      2.424(2)    ?     . .
C(3)      C(9)      2.506(2)    ?     . .
C(4)      N(1)      3.340(2)    ?     . 55504
C(4)      C(6)      2.407(2)    ?     . .
C(4)      C(7)      2.775(2)    ?     . .
C(4)      C(8)      2.421(2)    ?     . .
C(5)      C(7)      2.401(2)    ?     . .
C(5)      C(8)      2.789(2)    ?     . .
C(6)      C(8)      2.417(2)    ?     . .
C(7)      C(9)      2.496(2)    ?     . .
C(9)      C(10)     2.367(2)    ?     . .
C(9)      C(11)     2.735(2)    ?     . .
C(9)      C(12)     2.467(2)    ?     . .
C(10)     C(12)     2.469(2)    ?     . .
C(12)     C(13)     2.845(2)    ?     . .
C(13)     C(14)     2.463(2)    ?     . .
C(13)     C(15)     3.218(2)    ?     . .
C(13)     C(17)     2.466(2)    ?     . .
C(13)     C(18)     3.221(2)    ?     . .
C(13)     C(19)     2.891(2)    ?     . .
C(14)     C(17)     2.493(2)    ?     . .
C(14)     C(19)     3.414(2)    ?     . .
C(15)     C(16)     2.527(2)    ?     . .
C(15)     C(17)     3.042(2)    ?     . .
C(15)     C(19)     3.337(2)    ?     . .
C(16)     C(17)     3.088(2)    ?     . .
C(18)     C(19)     2.511(3)    ?     . .
N(1)      H(2)      2.4859      ?     . 45504
N(1)      H(5)      2.4870      ?     . .
N(1)      H(6)      1.9825      ?     . .
N(1)      H(7)      1.9822      ?     . .
N(1)      H(8)      3.2738      ?     . .
N(1)      H(9)      2.7024      ?     . .
N(1)      H(11)     3.2228      ?     . .
N(2)      H(1)      3.2419      ?     . .
N(2)      H(6)      3.1385      ?     . .
N(2)      H(8)      3.2709      ?     . .
N(2)      H(9)      2.7071      ?     . .
N(2)      H(10)     1.9989      ?     . .
N(2)      H(11)     1.9989      ?     . .
N(2)      H(12)     2.6458      ?     . .
N(2)      H(13)     3.2636      ?     . .
N(2)      H(14)     3.3657      ?     . .
N(3)      H(1)      3.5718      ?     . .
N(3)      H(10)     2.4624      ?     . .
N(3)      H(11)     3.5360      ?     . .
N(3)      H(12)     1.9863      ?     . .
N(3)      H(13)     1.9866      ?     . .
N(3)      H(14)     1.9706      ?     . .
N(3)      H(15)     2.86(2)     ?     . .
N(3)      H(16)     3.41(2)     ?     . .
N(3)      H(17)     2.80(2)     ?     . .
N(3)      H(18)     2.76(1)     ?     . .
N(3)      H(19)     3.32(2)     ?     . .
N(3)      H(20)     2.61(2)     ?     . .
N(3)      H(21)     1.9722      ?     . .
N(3)      H(22)     3.31(2)     ?     . .
N(3)      H(23)     2.64(1)     ?     . .
N(3)      H(24)     2.73(2)     ?     . .
N(3)      H(25)     2.77(2)     ?     . .
N(3)      H(26)     3.36(2)     ?     . .
N(3)      H(27)     2.88(2)     ?     . .
C(1)      H(1)      1.9915      ?     . .
C(1)      H(10)     2.6111      ?     . .
C(1)      H(11)     2.8102      ?     . .
C(1)      H(12)     2.0237      ?     . .
C(1)      H(13)     2.0240      ?     . .
C(1)      H(14)     2.5304      ?     . .
C(2)      H(2)      2.6814      ?     . .
C(2)      H(9)      3.2770      ?     . 55504
C(2)      H(12)     3.1323      ?     . .
C(2)      H(13)     2.5292      ?     . .
C(2)      H(14)     2.7687      ?     . .
C(3)      H(1)      2.0731      ?     . .
C(3)      H(2)      2.0469      ?     . .
C(3)      H(3)      3.2739      ?     . .
C(3)      H(5)      3.2807      ?     . .
C(4)      H(1)      2.6864      ?     . .
C(4)      H(3)      2.0254      ?     . .
C(4)      H(4)      3.2632      ?     . .
C(4)      H(5)      3.2627      ?     . 55504
C(4)      H(7)      3.4101      ?     . 55504
C(5)      H(2)      2.0231      ?     . .
C(5)      H(4)      2.0473      ?     . .
C(5)      H(5)      3.2575      ?     . .
C(5)      H(5)      3.3640      ?     . 55504
C(5)      H(21)     3.4404      ?     . 55604
C(5)      H(22)     3.51(2)     ?     . 55604
C(6)      H(2)      3.2627      ?     . .
C(6)      H(3)      2.0447      ?     . .
C(6)      H(5)      2.0239      ?     . .
C(7)      H(2)      3.1281      ?     . 45504
C(7)      H(3)      3.2575      ?     . .
C(7)      H(4)      2.0302      ?     . .
C(7)      H(26)     3.47(2)     ?     . 55601
C(8)      H(1)      3.2951      ?     . .
C(8)      H(2)      3.2791      ?     . .
C(8)      H(2)      3.3204      ?     . 45504
C(8)      H(4)      3.2730      ?     . .
C(8)      H(5)      2.0415      ?     . .
C(9)      H(2)      2.9687      ?     . 45504
C(9)      H(5)      2.6507      ?     . .
C(9)      H(6)      2.8038      ?     . .
C(9)      H(7)      3.0839      ?     . .
C(9)      H(9)      2.8997      ?     . .
C(9)      H(10)     3.1843      ?     . .
C(9)      H(11)     2.9205      ?     . .
C(10)     H(2)      3.1319      ?     . 45504
C(10)     H(8)      2.0349      ?     . .
C(10)     H(9)      2.0349      ?     . .
C(10)     H(10)     3.2846      ?     . .
C(10)     H(11)     2.7022      ?     . .
C(11)     H(1)      3.5729      ?     . 45504
C(11)     H(6)      2.0256      ?     . .
C(11)     H(7)      2.0257      ?     . .
C(11)     H(10)     2.0385      ?     . .
C(11)     H(11)     2.0387      ?     . .
C(11)     H(16)     3.07(1)     ?     . 45504
C(11)     H(17)     3.34(2)     ?     . 45504
C(12)     H(6)      2.6773      ?     . .
C(12)     H(7)      3.2852      ?     . .
C(12)     H(8)      2.0429      ?     . .
C(12)     H(9)      2.0437      ?     . .
C(12)     H(12)     2.6069      ?     . .
C(12)     H(16)     3.57(1)     ?     . 45504
C(12)     H(17)     3.53(1)     ?     . 45504
C(12)     H(23)     3.40(2)     ?     . .
C(12)     H(24)     3.21(2)     ?     . .
C(13)     H(1)      2.6291      ?     . .
C(13)     H(10)     2.5560      ?     . .
C(13)     H(11)     2.9762      ?     . .
C(13)     H(14)     2.4892      ?     . .
C(13)     H(17)     2.99(2)     ?     . .
C(13)     H(21)     3.2209      ?     . .
C(13)     H(23)     3.57(1)     ?     . .
C(13)     H(24)     3.01(2)     ?     . .
C(13)     H(25)     3.00(2)     ?     . .
C(13)     H(27)     2.74(2)     ?     . .
C(14)     H(1)      3.4567      ?     . .
C(14)     H(9)      3.5710      ?     . 55504
C(14)     H(10)     3.5607      ?     . .
C(14)     H(12)     3.2645      ?     . .
C(14)     H(13)     2.6312      ?     . .
C(14)     H(15)     2.14(2)     ?     . .
C(14)     H(16)     2.12(2)     ?     . .
C(14)     H(17)     2.13(2)     ?     . .
C(14)     H(18)     2.11(1)     ?     . .
C(14)     H(19)     2.08(2)     ?     . .
C(14)     H(20)     2.08(2)     ?     . .
C(14)     H(21)     2.4590      ?     . .
C(14)     H(22)     3.60(2)     ?     . 65602
C(14)     H(25)     3.23(2)     ?     . .
C(15)     H(8)      3.4495      ?     . 55504
C(15)     H(9)      3.1184      ?     . 55504
C(15)     H(10)     3.4646      ?     . 55504
C(15)     H(13)     2.9062      ?     . .
C(15)     H(14)     2.0205      ?     . .
C(15)     H(18)     2.77(1)     ?     . .
C(15)     H(19)     2.73(2)     ?     . .
C(15)     H(20)     3.39(2)     ?     . .
C(15)     H(20)     3.40(2)     ?     . 55504
C(15)     H(21)     2.8618      ?     . .
C(15)     H(22)     2.95(2)     ?     . 65602
C(15)     H(23)     3.14(2)     ?     . 55504
C(15)     H(25)     2.73(2)     ?     . .
C(16)     H(14)     2.0099      ?     . .
C(16)     H(15)     2.79(2)     ?     . .
C(16)     H(16)     2.72(1)     ?     . .
C(16)     H(17)     3.41(2)     ?     . .
C(16)     H(17)     3.39(2)     ?     . 45504
C(16)     H(21)     2.6713      ?     . .
C(16)     H(22)     3.09(2)     ?     . 65602
C(16)     H(25)     3.12(1)     ?     . 45504
C(16)     H(26)     3.13(2)     ?     . 65602
C(17)     H(3)      3.3621      ?     . 45404
C(17)     H(10)     3.1866      ?     . .
C(17)     H(12)     2.5413      ?     . .
C(17)     H(13)     2.7637      ?     . .
C(17)     H(14)     3.2664      ?     . .
C(17)     H(15)     2.83(1)     ?     . .
C(17)     H(17)     3.35(1)     ?     . .
C(17)     H(18)     2.87(2)     ?     . .
C(17)     H(20)     3.35(2)     ?     . .
C(17)     H(22)     2.08(1)     ?     . .
C(17)     H(23)     2.08(2)     ?     . .
C(17)     H(24)     2.09(2)     ?     . .
C(17)     H(25)     2.16(2)     ?     . .
C(17)     H(26)     2.07(2)     ?     . .
C(17)     H(27)     2.11(2)     ?     . .
C(18)     H(3)      3.3830      ?     . 45404
C(18)     H(10)     2.8197      ?     . .
C(18)     H(12)     2.8968      ?     . .
C(18)     H(15)     3.17(1)     ?     . 64602
C(18)     H(16)     3.52(1)     ?     . 64602
C(18)     H(18)     3.30(2)     ?     . 64602
C(18)     H(21)     2.0177      ?     . .
C(18)     H(25)     3.43(2)     ?     . .
C(18)     H(26)     2.72(2)     ?     . .
C(18)     H(27)     2.72(2)     ?     . .
C(19)     H(4)      3.5512      ?     . 55401
C(19)     H(12)     2.8296      ?     . .
C(19)     H(13)     2.7374      ?     . .
C(19)     H(15)     2.96(2)     ?     . .
C(19)     H(17)     3.29(2)     ?     . .
C(19)     H(18)     3.28(2)     ?     . 64602
C(19)     H(19)     3.55(1)     ?     . 64602
C(19)     H(20)     3.52(1)     ?     . 55504
C(19)     H(21)     2.0260      ?     . .
C(19)     H(22)     2.67(1)     ?     . .
C(19)     H(23)     3.35(2)     ?     . .
C(19)     H(24)     2.72(2)     ?     . .
H(1)      C(11)     3.5729      ?     . 55504
H(2)      N(1)      2.4859      ?     . 55504
H(2)      C(7)      3.1281      ?     . 55504
H(2)      C(8)      3.3204      ?     . 55504
H(2)      C(9)      2.9687      ?     . 55504
H(2)      C(10)     3.1319      ?     . 55504
H(3)      C(17)     3.3621      ?     . 55604
H(3)      C(18)     3.3830      ?     . 55604
H(4)      C(19)     3.5512      ?     . 55601
H(5)      C(4)      3.2627      ?     . 45504
H(5)      C(5)      3.3640      ?     . 45504
H(7)      C(4)      3.4101      ?     . 45504
H(8)      C(15)     3.4495      ?     . 45504
H(9)      C(2)      3.2770      ?     . 45504
H(9)      C(14)     3.5710      ?     . 45504
H(9)      C(15)     3.1184      ?     . 45504
H(10)     C(15)     3.4646      ?     . 45504
H(15)     C(18)     3.17(1)     ?     . 65602
H(16)     C(11)     3.07(1)     ?     . 55504
H(16)     C(12)     3.57(1)     ?     . 55504
H(16)     C(18)     3.52(1)     ?     . 65602
H(17)     C(11)     3.34(2)     ?     . 55504
H(17)     C(12)     3.53(1)     ?     . 55504
H(17)     C(16)     3.39(2)     ?     . 55504
H(18)     C(18)     3.30(2)     ?     . 65602
H(18)     C(19)     3.28(2)     ?     . 65602
H(19)     C(19)     3.55(1)     ?     . 65602
H(20)     C(15)     3.40(2)     ?     . 45504
H(20)     C(19)     3.52(1)     ?     . 45504
H(21)     C(5)      3.4404      ?     . 45404
H(22)     C(5)      3.51(2)     ?     . 45404
H(22)     C(14)     3.60(2)     ?     . 64602
H(22)     C(15)     2.95(2)     ?     . 64602
H(22)     C(16)     3.09(2)     ?     . 64602
H(23)     N(3)      2.64(1)     ?     . .
H(23)     C(12)     3.40(2)     ?     . .
H(23)     C(13)     3.57(1)     ?     . .
H(23)     C(15)     3.14(2)     ?     . 45504
H(23)     C(17)     2.08(2)     ?     . .
H(23)     C(19)     3.35(2)     ?     . .
H(25)     C(16)     3.12(1)     ?     . 55504
H(26)     C(7)      3.47(2)     ?     . 55401
H(26)     C(16)     3.13(2)     ?     . 64602

#==============================================================================

# Additional structures and associated data_? identifiers
# should be added at this point if there is more than one 
# structure analysis in the CIF.

#==============================================================================

#     End of CIF

#==============================================================================
